# Supplementary material for: The Implementation of Mass-Vaccination against SARS-CoV-2: A Systematic Review of Existing Strategies and Guidelines
Source: PubMed Central journal article supplement (PMC8066252; doi:10.3390/vaccines9040326), 2021-04-01
Supplement: vaccines-09-00326-s001.pdf [file vaccines-09-00326-s001.pdf]

**Table S1.** Overview of COVID-19 vaccination data available on government websites in English.

| Country                                               | Austria         | Belgium        | Canada           | EU         | Iceland          | India           | Ireland        | Lebanon          | Nepal  | Netherlands    | Seychelles      | Switzerland | UAE       | UK               | USA        |
|-------------------------------------------------------|-----------------|----------------|------------------|------------|------------------|-----------------|----------------|------------------|--------|----------------|-----------------|-------------|-----------|------------------|------------|
| Reference                                             | [1]             | [2]            | [3]              | [4]        | [5]              | [6]             | [7]            | [8]              | [9]    | [10]           | [11]            | [12]        | [13]      | [14]             | [15]       |
| Date of document                                      | Feb 28          | Feb 28         | Feb 26           | Feb 24     | Feb 26           | Feb 23          | Feb 25         |                  | Feb 21 | Feb 23         | Feb 26          | Feb 26      | Feb 28    | Feb 28           | Feb 28     |
| Date of first vaccine in setting                      | 10 January 2021 |                | 19 December 2020 |            | 19 December 2020 | 16 January 2021 |                | 15 February 2021 |        | 6 January 2021 |                 |             |           | 13 December 2020 |            |
| Total population of setting (million)                 | 9.0             | 11.6           | 37.7             | 444.9      | 0.3              | 1380            | 4.9            | 6.8              | 29.1   | 17.1           | 0.1             | 8.7         | 9.9       | 67.9             | 331        |
| Vaccines offered                                      | Pf/B            | Pf/B Mod AZ/Ox | Pf/B Mod         | NR         | Pf/B Mod AZ/Ox   | NR              | Pf/B Mod AZ/Ox | Pf/B             | NR     | Pf/B Mod AZ/Ox | Az/Ox Sinopharm | NR          | NR        | NR               | Pf/B Mod   |
| Total number of vaccine doses administered ('000)     | 648,639         | 1,106,512      | 1,777,405        | 27,425,844 | 32,157           | 11,900,000      | NR             | 40,641           | NR     | 1,319,008      | 75,096          | 748,791     | 6,020,461 | NR               | 75,200,000 |
| Total number of individuals vaccinated ('000)         | 414,441         | 800,030        | 1,086,025        | NR         | NR               | NR              | NR             | NR               | NR     | NR             | NR              | NR          | NR        | NR               | NR         |
| Percentage vaccinated—total (%) *                     | 5.3             | 7.0            | 2.9              | NR         | NR               | NR              | 8.3            | NR               | 1.4    | 7.0            | 52              | NR          | NR        | 29.6             | 15         |
| Percentage of the population receiving one dose (%) * | 2.7             | 4.3            | 1.7              | NR         | NR               | NR              | 5.5            | NR               | NR     | 4.7            | 28              | NR          | NR        | 28.5             | 7.5        |
| Percentage of population receiving two doses (%) *    | 2.6             | 2.7            | 1.1              | NR         | NR               | NR              | 2.8            | NR               | NR     | 1.3            | 24              | 2.5         | NR        | 1.1              | 7.5        |
| Percentage of all eligible males vaccinated (%)       | 2.3             | NR             | 4.0              | NR         | NR               | NR              | NR             | NR               | NR     | NR             | NR              | NR          | NR        | NR               | NR         |
| Percentage of all eligible females vaccinated (%)     | 6.1             | NR             | 1.7              | NR         | NR               | NR              | NR             | NR               | NR     | NR             | NR              | NR          | NR        | NR               | NR         |

|                                                        |       |    |         |    |    |    |    |    |    |    |    |    |    |    |    |    |
|--------------------------------------------------------|-------|----|---------|----|----|----|----|----|----|----|----|----|----|----|----|----|
| Percentage of those in each age group vaccinated (%)   |       | NR |         | NR | NR | NR | NR | NR | NR | NR | NR | NR | NR | NR | NR |    |
| Under 18 years                                         | 0.07  |    | 0.03    |    |    |    |    |    |    |    |    |    |    |    |    |    |
| 18–65 years                                            | 9.28  |    | 1.6–4.7 |    |    |    |    |    |    |    |    |    |    |    |    |    |
| >65 years                                              | 29.55 |    |         |    |    |    |    |    |    |    |    |    |    |    |    |    |
| Percentage of those in high risk groups vaccinated (%) | NR    | NR |         | NR | NR | NR | NR | NR | NR | NR | NR | NR | NR | NR | NR |    |
| Frontline HCW                                          |       |    | 47.8    |    |    |    |    |    |    |    |    |    |    |    |    |    |
| Aged care residents                                    |       |    | 67.5    |    |    |    |    |    |    |    |    |    |    |    |    |    |
| Elderly                                                |       |    | 14.1    |    |    |    |    |    |    |    |    |    |    |    |    |    |
| Time taken to vaccinate first 100,000 people (days)    | NR    | NR | NR      | NR | NR | NR | NR | NR | NR | NR | 34 | NR | NR | NR | 14 | NR |
| Time taken to vaccinate first 1,000,000 people (days)  | NR    | 18 | 24      | NR | NR | NR | NR | NR | NR | NR | NR | NR | NR | NR | NR | NR |

AZ/Ox AstraZenca/Oxford, EU European Union, HCW Health care worker, Mod Moderna, NR not reported, Pf/B Pfizer BioNTech, UAE United Arab Emirates, UK United Kingdom, USA United States of America. \* may be calculated value.

## Reference

1. Federal Ministry Republic of Austria. *COVID-19 Vaccination in Austria*; Federal Ministry Republic of Austria: Vienna, Austria, 2021. Available online: <https://info.gesundheitsministerium.at/en/> (accessed on 1 March, 2021).
2. datrix.be. Covid Vaccinations Belgium. 2021. Available online: <https://covid-vaccinatie.be/en> (accessed on 1 March, 2021).
3. Government of Canada. COVID-19 Vaccination in CANADA. 2021. Available online: <https://health-infobase.canada.ca/covid-19/vaccine-administration/> (accessed on 1 March, 2021).
4. European Centre for Disease Prevention and Control. *Overview of the Implementation of COVID-19 Vaccination Strategies and Vaccine Deployment Plans in the EU/EEA*; European Centre for Disease Prevention and Control: Stockholm, Sweden, 2021.
5. The Directorate of Health and the Department of Civil Protection and Emergency Management. *COVID-19 Vaccinations in Iceland—Statistics*; The Directorate of Health and the Department of Civil Protection and Emergency Management: Reykjavík, Iceland, 2021. Available online: <https://www.covid.is/statistical-information-on-vaccination> (accessed on 1 March, 2021).
6. Government of India. Update on COVID-19 Vaccination-Day 39. 2021. Available online: <https://pib.gov.in/PressReleaseDetailm.aspx?PRID=1700269> (accessed on 1 March, 2021).
7. Government of Ireland. Ireland’s COVID-19 Data. 2021. Available online: <https://covid19ireland-geohive.hub.arcgis.com> (accessed on 1 March, 2021).
8. Central Inspection Lebanon. 2021 Available online: <https://impact.cib.gov.lb/home/dashboard/vaccine> (accessed on 1 March, 2021).

9. Health Sector Response to COVID-19. Government of Nepal. Health Sector Response to COVID-19, Nepal. 2021. Available online: <https://covid19.mohp.gov.np/> (accessed on 1 March, 2021).
10. National Institute for Public Health and the Environment. *Figures on the COVID-19 Vaccination Programme*; National Institute for Public Health and the Environment: Utrecht, The Netherlands, 2021. Available online: <https://www.rivm.nl/en/covid-19-vaccination/figures-on-covid-19-vaccination-programme> (accessed on 1 March, 2021).
11. Ministry of Health Seychelles. *COVID-19 Vaccination Uptake Report*; Ministry of Health Seychelles: Victoria, Seychelles, 2021.
12. Federal Office of Public Health FOPH. COVID-19 Switzerland. Federal Office of Public Health FOPH. 2021. Available online: <https://www.covid19.admin.ch/en/epidemiologic/vacc-doses?detGeo=CH&vaccRel=abs&geoView=table> (accessed on 1 March, 2021).
13. Ministry of Health and Prevention. *UAE Coronavirus (COVID-19) Updates*; Ministry of Health and Prevention, United Arab Emirates, 2021. Available online: [covid19.ncema.gov.ae/en](https://covid19.ncema.gov.ae/en) (accessed on 1 March, 2021).
14. Gov.UK. *Coronavirus (COVID-19) in the UK*; Gov.UK, United Kingdom, 2021. Available online: <https://coronavirus.data.gov.uk/details/vaccinations> (accessed on 1 March, 2021).
15. Center for Disease Control and Prevention. *COVID-19 Vaccinations in the United States*; Center for Disease Control and Prevention: Atlanta, GA, USA, 2021. Available online: <https://covid.cdc.gov/covid-data-tracker/#vaccinations> (accessed on 1 March, 2021).
